# Supplementary material
Source: PubMed Central journal article supplement (PMC3554334)
Supplement: cdd2012124x1.pdf [file cdd2012124x1.pdf]

## Supplementary Figure

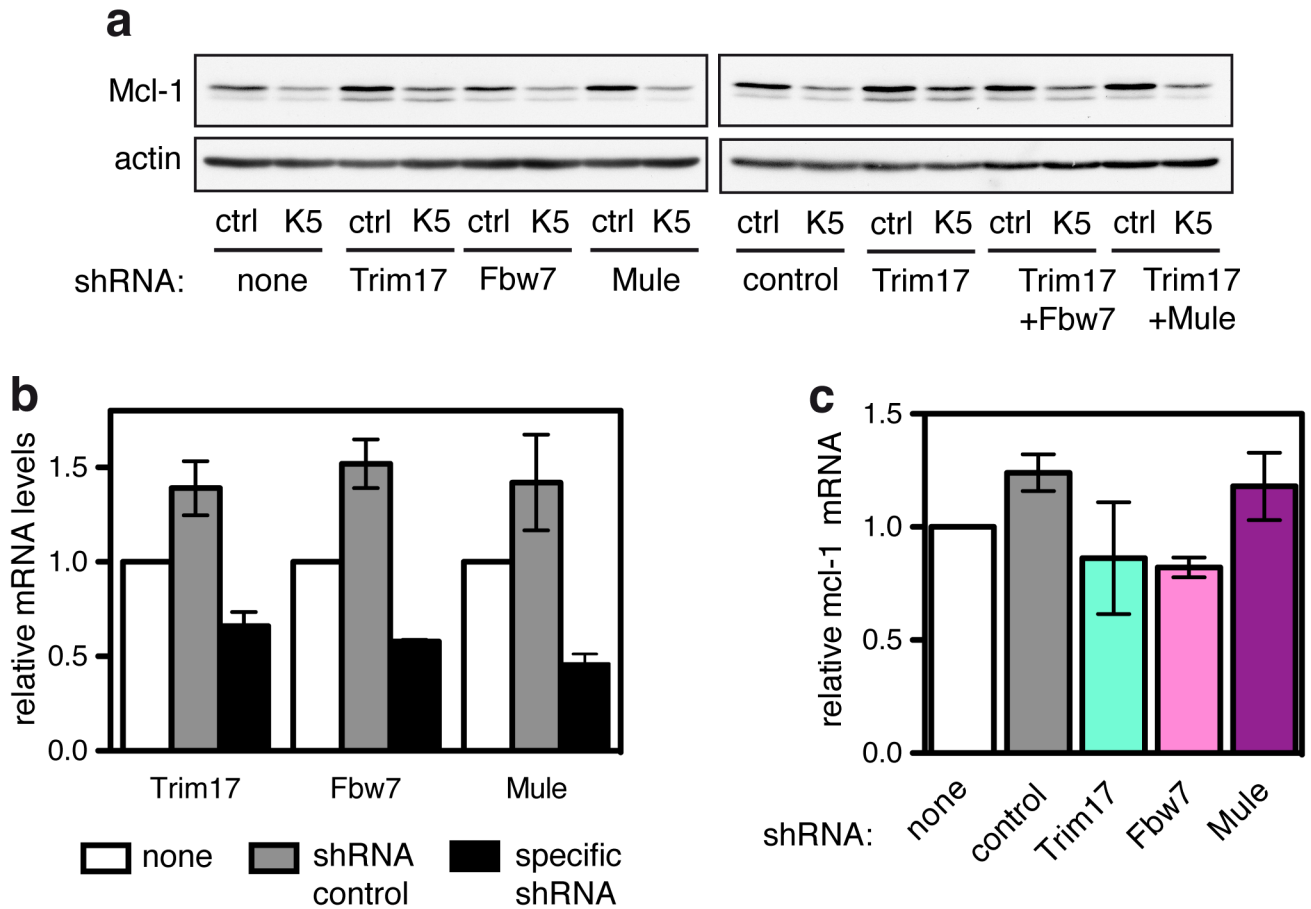

Supplementary Figure: Trim17 is the main Mcl-1 E3 ubiquitin ligase in CGNs.

(a) One day after plating, CGNs were left untreated (shRNA: none), or were transduced with lentiviral particles expressing a non-targeting shRNA control or shRNA sequences against *Trim17* (shRNA Trim17#2), *Fbw7* or *Mule*. Alternatively, neurons were co-transduced with shRNA Trim17#2 together with shRNAs against *Fbw7* or *Mule*. At DIV6, neurons were incubated for 6 h in K5 medium or maintained in the initial culture medium (ctrl). Then, proteins were analysed by western blotting using antibodies against Mcl-1 and actin.

(b) CGNs were transduced with shRNA control or with shRNAs against *Trim17*, *Fbw7* or *Mule*. At DIV6, total RNA was extracted and mRNA levels of *Trim17*, *Fbw7* or *Mule* were estimated by quantitative PCR in neurons transduced with the shRNA targeting the corresponding gene (specific shRNA) or in neurons transduced with shRNA control or in non-transduced neurons (none).

(c) CGNs were transduced with shRNA control or with shRNAs against *Trim17*, *Fbw7* or *Mule*. At DIV6, total RNA was extracted and *mcl-1* mRNA levels were estimated by quantitative PCR.

The HIV-derived lentiviral vectors pLKO.1 containing the shRNAs TRCN0000373989 (*Fbw7*) and TRCN0000327534 (*Mule*) were obtained from Sigma. The following primers were used to amplify mouse *Fbw7*: forward 5' GCGAGACTTCATCTCCTTGC 3'; reverse 5' TGCAACGGTTCATCAATCCC 3'; and mouse *Mule*: forward 5' AGAAGGCCATTCAAGACCCT 3'; reverse 5' GGACTTCCCTTG TAGCAGGA 3'.
